# Supplementary material for: The Herbicide Atrazine Activates Endocrine Gene Networks via Non-Steroidal NR5A Nuclear Receptors in Fish and Mammalian Cells
Source: PLOS journal article supplement (doi:10.1371/journal.pone.0002117), 2008-05-06
Supplement: S4 (10.1371/journal.pone.0002117.s004) [file journal.pone.0002117.s004]

### Supplemental Figure 3

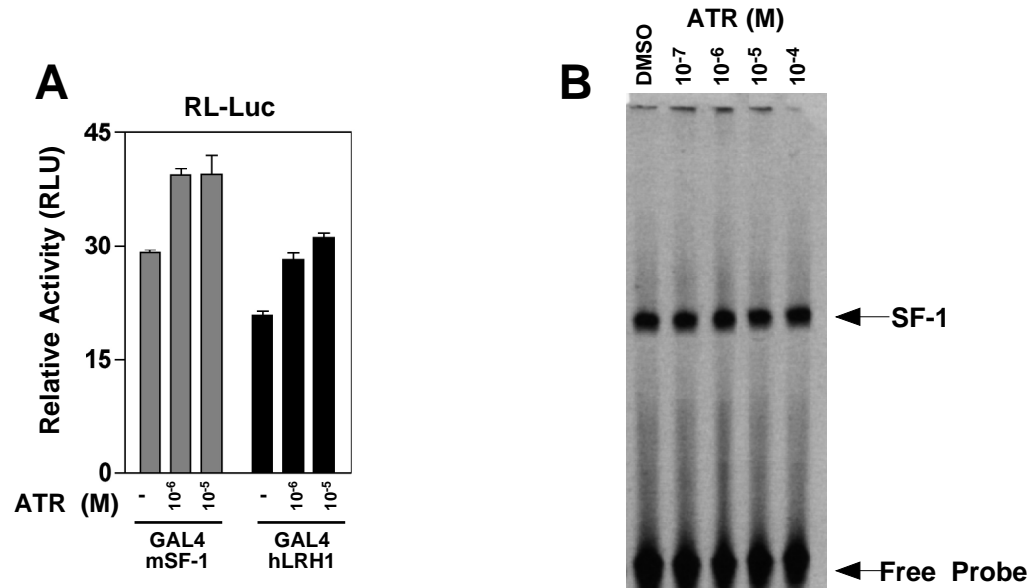

**A.** GAL-4 fused luciferase activity is shown using 200  $\mu$ g of GAL-4 reporter, pFR-Luc (Stratagene), as indicated with 100  $\mu$ g of mSF-1 (hinge-LBD aa105 to 462) or hLRH-1 (aa198 to 562), with increasing concentrations of ATR added.

**B.** EMSA assay. For EMSA binding assays, the mMIS SF-1 binding site was used. Sequences are described in Supporting Information. The concentration of ATR is indicated, and was added to binding buffer and then incubated with purified mSF-1 containing the entire DNA binding domain.
