# Supplementary material for: The Herbicide Atrazine Activates Endocrine Gene Networks via Non-Steroidal NR5A Nuclear Receptors in Fish and Mammalian Cells
Source: PLOS journal article supplement (doi:10.1371/journal.pone.0002117), 2008-05-06
Supplement: S5 (10.1371/journal.pone.0002117.s005) [file journal.pone.0002117.s005]

## Supplemental Figure 4

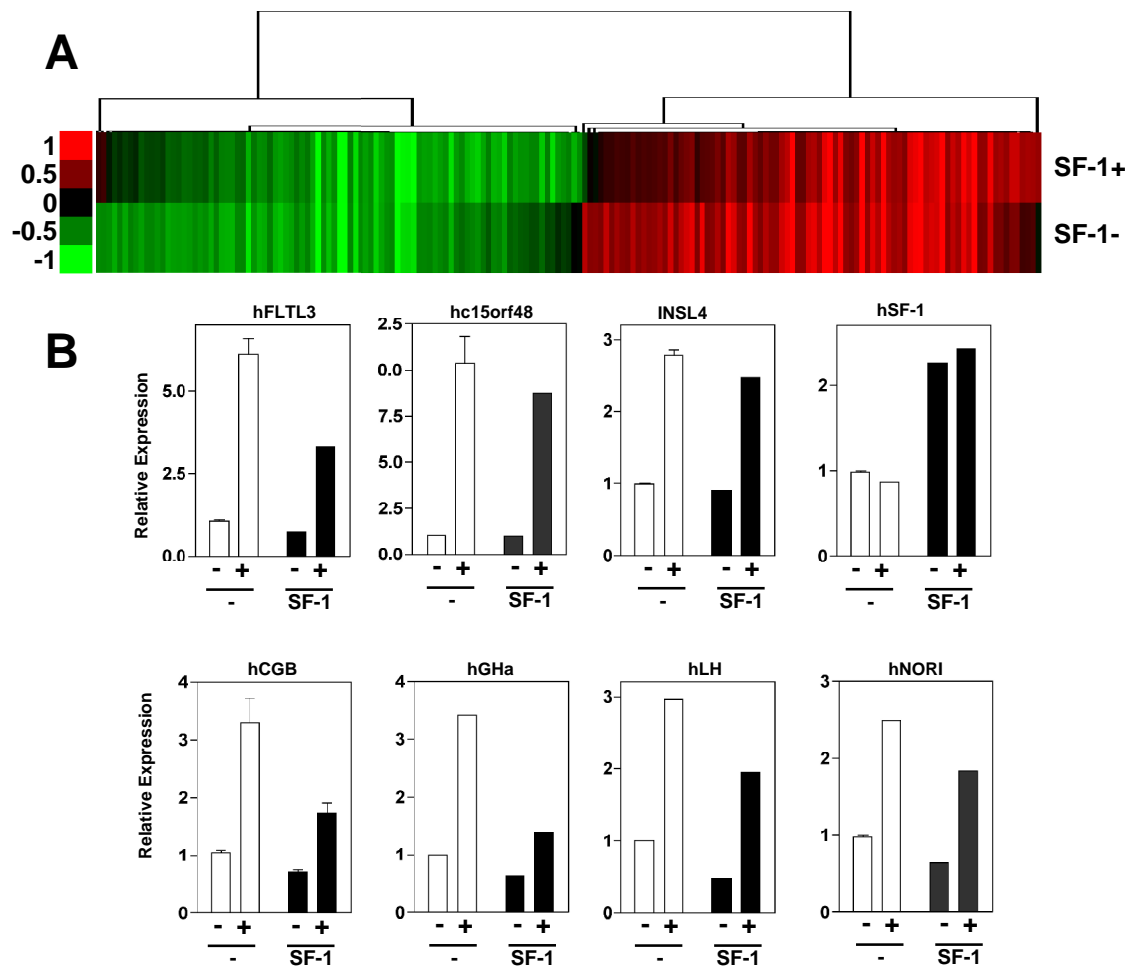

**A.** Cluster analysis of significant ( $P < 0.001$ ) changes in gene expression after ATR (10  $\mu\text{M}$ , 24 hrs) compared to DMSO, and with or without transfection of mouse SF-1 (SF-1+ or SF-1-). The relative fold change is indicated on the bar legend to the left.

**B.** Relative expression levels in JEG3 cells (with/ without transfection of mSF-1) after DMSO (-) or treatment with ATR (10  $\mu\text{M}$ ). JEG3 cells were transfected with 5  $\mu\text{g}$  of mSF-1 and treated with the ATR for 24hrs with RT-qPCR analysis carried out using validated primers as indicated in Table S2. Endogenous expression levels of hSF-1 are shown by RT-qPCR (right upper panel).
