# Supplementary material for: The Herbicide Atrazine Activates Endocrine Gene Networks via Non-Steroidal NR5A Nuclear Receptors in Fish and Mammalian Cells
Source: PLOS journal article supplement (doi:10.1371/journal.pone.0002117), 2008-05-06
Supplement: S6 (10.1371/journal.pone.0002117.s006) [file journal.pone.0002117.s006]

## Supplemental Figure 5

### HepG2 Cells

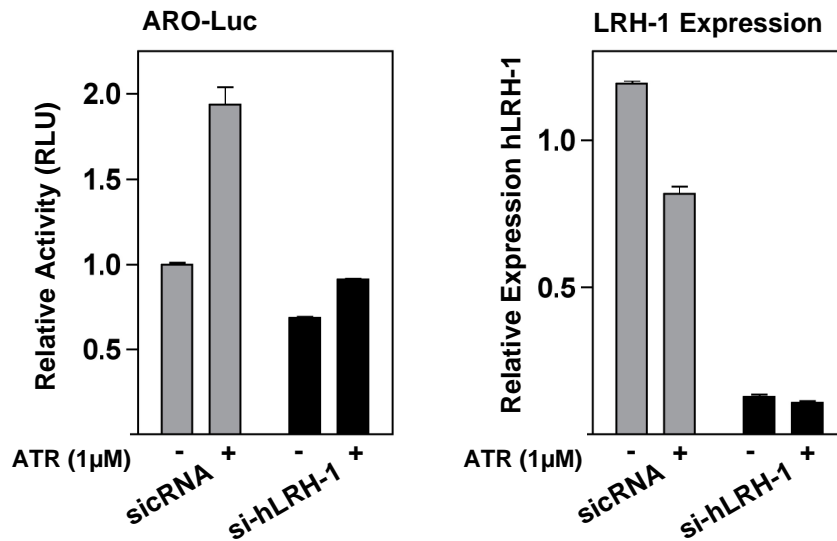

HepG2 liver cells were transfected with 200 ng of ARO-Luc and with either 100 ng siRNA of control (sicRNA) or hLRH-1 (si-hLRH-1), **left panel**. Relative luciferase activities after drug treatment are shown as mean values  $\pm$  s. d. Endogenous transcript levels of hLRH-1 are shown as determined by RT-qPCR, **right panel**.
